# Supplementary material for: Physical Activity in Patients with Prader-Willi Syndrome—A Systematic Review of Observational and Interventional Studies
Source: MDPI journal article supplement (doi:10.3390/jcm10112528), 2021-06-07
Supplement: s1 [file s1]

# Physical activity in patients with Prader-Willi syndrome - A systematic review of observational and interventional studies

Alice Bellicha<sup>1</sup>, Muriel Coupaye<sup>2</sup>, H  lena Mosbah<sup>2</sup>, Maith   Tauber<sup>3</sup>, Jean-Michel Oppert<sup>2</sup>, Christine Poitou<sup>1,2\*</sup>

<sup>1</sup> Sorbonne University, INSERM, Nutrition and obesities: systemic approaches (NutriOmics), F-75013, Paris, France; [alice.bellicha@u-pec.fr](mailto:alice.bellicha@u-pec.fr)

<sup>2</sup> Assistance Publique-H  pitaux de Paris (AP-HP), Piti  -Salp  ri  re hospital, Department of Nutrition, Rare Diseases Center of reference 'Prader-Willi Syndrome and obesity with eating disorders' (PRADORT), Sorbonne University, F-75013, Paris, France; [muriel.coupaye@aphp.fr](mailto:muriel.coupaye@aphp.fr); [helena.mosbah@aphp.fr](mailto:helena.mosbah@aphp.fr); [jean-michel.oppert@aphp.fr](mailto:jean-michel.oppert@aphp.fr); [christine.poitou-bernert@aphp.fr](mailto:christine.poitou-bernert@aphp.fr)

<sup>3</sup> Centre de R  f  rence du Syndrome de Prader-Willi, H  pital des Enfants, Toulouse, France; Axe P  diatrique du CIC 9302/INSERM, H  pital des Enfants, Toulouse, France; Institut Toulousain des Maladies Infectieuses et Inflammatoires, INSERM UMR1291, CNRS UMR5051, Universit   Toulouse III, Toulouse, France; [tauber.mt@chu-toulouse.fr](mailto:tauber.mt@chu-toulouse.fr)

\* Correspondence: [christine.poitou-bernert@aphp.fr](mailto:christine.poitou-bernert@aphp.fr); Tel.: +33(0)142175771

## SUPPLEMENTARY MATERIAL

**Table S1. Study quality of intervention studies**

| References                                            | Criteria |     |     |    |     |     |     |     |     |     |     |     |     |     | Number of "fatal flaws" | Quality rating |
|-------------------------------------------------------|----------|-----|-----|----|-----|-----|-----|-----|-----|-----|-----|-----|-----|-----|-------------------------|----------------|
|                                                       | 1        | 2   | 3   | 4  | 5   | 6   | 7   | 8   | 9   | 10  | 11  | 12  | 13  | 14  |                         |                |
| <i>Randomized or non-randomized controlled trials</i> |          |     |     |    |     |     |     |     |     |     |     |     |     |     |                         |                |
| Vismara 2010 [1]                                      | No       | NA  | NR  | No | No  | NR  | Yes | Yes | Yes | Yes | Yes | No  | Yes | Yes | 1                       | Fair           |
| Eiholzer 2003 [2]                                     | No       | NA  | NR  | No | No  | Yes | Yes | NA  | NR  | Yes | Yes | No  | Yes | NR  | 2                       | Fair           |
| Rubin, 2019 [3]                                       | No       | NA  | NR  | No | No  | Yes | No  | Yes | 0                       | Good           |
| Schlumpf 2006 [4]                                     | No       | NA  | NR  | No | No  | Yes | NR  | NR  | NR  | No  | Yes | No  | Yes | NR  | 2                       | Poor           |
| Shields 2020 [5]                                      | Yes      | Yes | Yes | No | Yes | Yes | NR  | NR  | Yes | Yes | Yes | No  | Yes | NR  | 0                       | Good           |
| <i>Single-group intervention studies</i>              |          |     |     |    |     |     |     |     |     |     |     |     |     |     |                         |                |
| Bellicha 2020 [6]                                     | Yes      | Yes | No  | NR | No  | Yes | Yes | No  | Yes | Yes | No  | NA  | -   | -   | 1                       | Fair           |
| Grolla 2011 [7]                                       | Yes      | No  | No  | NR | Yes | No  | Yes | NR  | NR  | No  | No  | NA  | -   | -   | 4                       | Poor           |
| Hsu 2018 [8]                                          | Yes      | Yes | No  | NR | No  | Yes | Yes | NR  | Yes | Yes | No  | NA  | -   | -   | 1                       | Fair           |

Criteria for controlled trials: #1- Randomized study, #2- Adequate randomization method, #3- Treatment allocation concealment, #4- Blinding treatment assignment, #5- Blinding outcome assessors, #6- **Similar baseline characteristics**, #7- Drop-out rate <20%, #8- Differential drop-out rate between groups <15%, #9- **High adherence**, #10- **Similar background treatments**, #11- Valid and reliable outcome measures, #12- Sample size justification, #13- Pre-specified outcomes/subgroups, #14- All randomized participants analyzed (ITT analysis).

Criteria for single-group interventions: #1- Question/objective clearly stated, #2- **Eligibility criteria pre-defined**, #3- **Representativeness**, #4- Enrolment rates, #5- Sufficient sample size, #6- Intervention clearly described, #7- Valid and reliable outcome measures, #8- Outcome assessors blinded, #9- **Drop-out rate <20% or intent to treat analysis**, #10- **Statistical analyses examined changes in outcomes**, #11- Multiple time points for outcome measurement, #12- Account for individual changes.

Criteria defined as fatal flaws are grey shaded.

**Table S2. Description of habitual physical activity and sedentary behavior**

| <b>References</b>                                                   | <b>Patients with PWS</b>          | <b>Control group</b>                  | <b>P-value</b> |
|---------------------------------------------------------------------|-----------------------------------|---------------------------------------|----------------|
| <b>Outcomes</b>                                                     |                                   |                                       |                |
| Bellicha 2020 [6]                                                   | <b>Adults with PWS</b>            | <b>Adults with NSO</b>                |                |
| Activity counts, counts/min                                         | Median (P25; P75): 211 (141; 333) | 334 (292; 384)                        | < 0.05         |
| Sedentary time, % wear time                                         | 72 (69; 75)                       | 58 (53; 64)                           | < 0.001        |
| Prolonged sedentary bouts ( $\geq$ 30 min), % total sedentary time  | 41%                               | 18%                                   | < 0.001        |
| Light - intensity PA, % wear time                                   | 24 (23; 28)                       | 38 (32; 45)                           | < 0.001        |
| MVPA, % wear time                                                   | 1.7 (0.8; 5.0)                    | 3.2 (2.6; 4.5)                        | 0.11           |
| MVPA in $\geq$ 10 - min bouts, min/week                             | 5 (0; 101)                        | 20 (0; 68)                            | 0.38           |
| Meet MVPA guidelines, n (%) <sup>1</sup>                            | 2 (20%)                           | 1 (5%)                                | 0.52           |
| Borland 2020 [9]                                                    | <b>Adults with PWS</b>            | Adults with ID: 132 (42%)             | < 0.05         |
| Reported participation in sports/PA over the past 3 months, %       | 19 (63%)                          | Down Syndrome: 39 (61%)               | NR             |
|                                                                     |                                   | Fragile X Syndrome: 29 (56%)          | NR             |
|                                                                     |                                   | Williams Syndrome: 24 (53%)           | NR             |
|                                                                     |                                   | Autism: 51 (54%)                      | NR             |
| Butler 2007 [10]                                                    | <b>Children/adults with PWS</b>   | <b>Children/adults with NSO</b>       |                |
| PA-induced EE, kcal/min                                             | Mean (SD): 0.86 (0.37)            | 1.27 (0.64)                           | < 0.001        |
| Exercise-induced EE, kcal/min                                       | 1.92 (0.61)                       | 3.08 (0.99)                           | < 0.001        |
| Total mechanical work <sup>2</sup> , W/8h                           | 30 (12)                           | 46 (34)                               | < 0.001        |
| Castner 2014 [11]                                                   | <b>Children with PWS</b>          | <b>Children with NSO</b>              |                |
| Sedentary time, min/d                                               | Mean (SD): 660.5 (15.1)           | 638.7 (11.7)                          | 0.26           |
| Light-intensity PA, min/d                                           | 130.3 (9.4)                       | 161.7 (7.0)                           | < 0.01         |
| Moderate-intensity PA, min/d                                        | 26.2 (2.4)                        | 28.9 (1.9)                            | 0.36           |
| Vigorous-intensity PA, min/d                                        | 9.9 (1.2)                         | 14.1 (1.3)                            | < 0.05         |
| MVPA, min/d                                                         | 36.1 (3.2)                        | 43.0 (2.9)                            | 0.14           |
| Meet MVPA guidelines <sup>3</sup> , n (%)                           | 2 (8%)                            | 7 (18%)                               | NR             |
| Duran 2016 [12]                                                     | <b>Children with PWS</b>          | --                                    | --             |
| Light-intensity PA, min/d                                           | Mean (SD): 129.0 (46.8)           | --                                    | --             |
| Moderate-intensity PA, min/d                                        | 25.3 (11.2)                       | --                                    | --             |
| Vigorous-intensity PA, min/d                                        | 9.3 (5.0)                         | --                                    | --             |
| MVPA, min/d                                                         | 34.6 (14.1)                       | --                                    | --             |
| Eiholzer 2003 [2]                                                   | <b>Children with PWS</b>          | <b>Children with normal weight</b>    |                |
| 3-days walking distance, km                                         | Mean: 11.1                        | 24.6                                  | < 0.05         |
| McAlister 2018 [13]                                                 | <b>Children with PWS</b>          | <b>Children with NSO</b>              |                |
| MVPA, min/d                                                         | Mean (SD): 33.9 (14.7)            | 44.0 (17.7)                           | < 0.05         |
| Meet MVPA guidelines <sup>3</sup> , n (%)                           | 1 (5%)                            | 3 (8.8%)                              | ns             |
| Nordstrom 2013 [14]                                                 | <b>Adults with PWS</b>            | <b>Adults with Down-syndrome</b>      |                |
| Total PA, counts/min                                                | Mean (SD): 249 (114.1)            | 306 (91.4)                            | 0.06           |
| Steps/d                                                             | 5781 (3053)                       | 6949 (2673)                           | ns             |
| Sedentary time, min/d                                               | 564 (66;9)                        | 491 (74.4)                            | 0.01           |
| Light-intensity PA, min/d                                           | 174 (47.5)                        | 240 (60.3)                            | < 0.001        |
| MVPA, min/d                                                         | 26.2 (20.8)                       | 25.5 (17.7)                           | ns             |
| MVPA in $\geq$ 10-min bouts, min/d                                  | 14.2 (15.1)                       | 9.4 (11.6)                            | ns             |
| Meet MVPA guidelines <sup>4</sup> , %                               | Females: 15%, males: 25%          | Females: 8%, males: 7%                | NR             |
| Rubin, 2019 [15]                                                    | <b>Children with PWS</b>          | <b>Children with NSO</b>              |                |
| Total PA, min/d                                                     | Mean (SE): 165 (11)               | 225 (10)                              | < 0.01         |
| MVPA, min/d                                                         | 34 (4)                            | 45 (3)                                | 0.07           |
| Vigorous-intensity PA, min/d                                        | 11 (2)                            | 14 (1)                                | 0.22           |
| Schlumpf 2006 [4]                                                   | <b>Children with PWS</b>          | --                                    | --             |
| 3-days walking distance, km                                         | Mean (SD): 12.5 (6.2)             | --                                    | --             |
| Sellinger 2006 [16]                                                 | <b>Children/adults with PWS</b>   | <b>Down syndrome: 1.65 (0.08)</b>     | ns             |
| Reported frequency of PA participation <sup>5</sup>                 | Mean (SD): 1.41 (0.15)            | <b>Williams syndrome: 1.86 (0.09)</b> | < 0.05         |
| van den Berg-Emons 2008 [17]                                        | <b>Children with PWS</b>          | <b>Children without obesity</b>       |                |
| Duration of dynamic activities <sup>6</sup> , % of a 24-hour period | Mean (SD): 8.7 (2.5)              | 12.0 (3.1)                            | 0.01           |

|                                                |                          |                          |         |
|------------------------------------------------|--------------------------|--------------------------|---------|
| Mean mobility, g                               | 0.023 (0.004)            | 0.028 (0.008)            | 0.09    |
| Walking speed, g                               | 0.178 (0.018)            | 0.170 (0.025)            | 0.32    |
| Walking periods > 10 s, n/d                    | 137 (42)                 | 171 (45)                 | 0.09    |
| Breaks in sedentary time, n/d                  | 116 (31)                 | 143 (42)                 | 0.13    |
| Van Mil 2000 [18]                              | <b>Children with PWS</b> | <b>Children with NSO</b> |         |
| PA-induced EE, MJ/d                            | Mean (SD): 1.07 (0.7)    | 2.56 (1.03)              | < 0.001 |
| PA-induced EE relative to body weight, kJ/kg/d | 23.1 (17.1)              | 46.09 (17.8)             | < 0.001 |
| PA level <sup>7</sup>                          | 1.33 (0.15)              | 1.55 (0.12)              | < 0.001 |
| Woods 2018 [19]                                | <b>Adults with PWS</b>   | --                       | --      |
| Steps/d                                        | Mean (SEM): 7632 (1171)  | --                       | --      |

<sup>1</sup> MVPA guidelines in adults at the time of the study: 150 min/week

<sup>2</sup> Total mechanical work = assessed by force platforms during 8h on a calorimetric chamber

<sup>3</sup> MVPA guidelines in children at the time of the study: 60 min/d

<sup>4</sup> MVPA guidelines in adults at the time of the study: 30 min/d of MVPA in 8- to 10-min bouts.

<sup>5</sup> Frequency assessed with a 5-point scale: 1= rarely, never to 5= daily

<sup>6</sup> Walking, cycling, general movement

<sup>7</sup> PA level = average daily metabolic rate divided by basal metabolic rate

Abbreviations: EE, energy expenditure; ID, intellectual disabilities; MVPA, moderate-to-vigorous PA; NSO, non-syndromic obesity

## References

1. Vismara, L.; Cimolin, V.; Grugni, G.; Galli, M.; Parisio, C.; Sibilia, O.; Capodaglio, P. Effectiveness of a 6-Month Home-Based Training Program in Prader-Willi Patients. *Res. Dev. Disabil.* **2010**, *31*, 1373–1379, doi:10.1016/j.ridd.2010.07.001.
2. Eiholzer, U.; Nordmann, Y.; l'Allemand, D.; Schlumpf, M.; Schmid, S.; Kromeyer-Hauschild, K. Improving Body Composition and Physical Activity in Prader-Willi Syndrome. *J Pediatr* **2003**, *142*, 73–8, doi:10.1067/mpd.2003.mpd0334.
3. Rubin, D.A.; Wilson, K.S.; Dumont-Driscoll, M.; Rose, D.J. Effectiveness of a Parent-Led Physical Activity Intervention in Youth with Obesity. *Med Sci Sports Exerc* **2019**, *51*, 805–813, doi:10.1249/MSS.0000000000001835.
4. Schlumpf, M.; Eiholzer, U.; Gyga, M.; Schmid, S.; van der Sluis, I.; l'Allemand, D. A Daily Comprehensive Muscle Training Programme Increases Lean Mass and Spontaneous Activity in Children with Prader-Willi Syndrome after 6 Months. *J Pediatr Endocrinol Metab* **2006**, *19*, 65–74.
5. Shields, N.; Bennell, K.L.; Radcliffe, J.; Taylor, N.F. Is Strength Training Feasible for Young People with Prader-Willi Syndrome? A Phase I Randomised Controlled Trial. *Physiotherapy* **2019**, doi:10.1016/j.physio.2019.01.016.
6. Bellicha, A.; Coupaye, M.; Hocquaux, L.; Speter, F.; Oppert, J.-M.; Poitou, C. Increasing Physical Activity in Adult Women with Prader-Willi Syndrome: A Transferability Study. *J Appl Res Intellect Disabil* **2020**, *33*, 258–267, doi:10.1111/jar.12669.
7. Grolla, E.; Andrighetto, G.; Parmigiani, P.; Hladnik, U.; Ferrari, G.; Bernardelle, R.; Lago, M.D.; Albarello, A.; Baschiroto, G.; Filippi, G.; et al. Specific Treatment of Prader-Willi Syndrome through Cyclical Rehabilitation Programmes. *Disabil Rehabil* **2011**, *33*, 1837–47, doi:10.3109/09638288.2010.549288.
8. Hsu, W.-L.; Chiu, V.J.-Y.; Chang, W.-H.; Lin, M.-C.; Wei, J.-T.; Tzeng, I.-S. Hand Strength and Dexterity in Patients with Prader-Willi Syndrome: A Pilot Intervention Study. *J. Int. Med. Res.* **2018**, *46*, 4669–4677, doi:10.1177/0300060518788243.
9. Borland, R.L.; Hu, N.; Tonge, B.; Einfeld, S.; Gray, K.M. Participation in Sport and Physical Activity in Adults with Intellectual Disabilities. *J. Intellect. Disabil. Res. JIDR* **2020**, *64*, 908–922, doi:10.1111/jir.12782.
10. Butler, M.G.; Theodoro, M.F.; Bittel, D.C.; Donnelly, J.E. Energy Expenditure and Physical Activity in Prader-Willi Syndrome: Comparison with Obese Subjects. *Am J Med Genet A* **2007**, *143A*, 449–59, doi:10.1002/ajmg.a.31507.
11. Castner, D.M.; Tucker, J.M.; Wilson, K.S.; Rubin, D.A. Patterns of Habitual Physical Activity in Youth with and without Prader-Willi Syndrome. *Res Dev Disabil* **2014**, *35*, 3081–8, doi:10.1016/j.ridd.2014.07.035.
12. Duran, A.T.; Wilson, K.S.; Castner, D.M.; Tucker, J.M.; Rubin, D.A. Association between Physical Activity and Bone in Children with Prader-Willi Syndrome. *J. Pediatr. Endocrinol. Metab. JPEM* **2016**, *29*, 819–826, doi:10.1515/jpem-2015-0233.
13. McAlister, K.L.; Fisher, K.L.; Dumont-Driscoll, M.C.; Rubin, D.A. The Relationship between Metabolic Syndrome, Cytokines and Physical Activity in Obese Youth with and without Prader-Willi Syndrome. *J Pediatr Endocrinol Metab* **2018**, *31*, 837–845, doi:10.1515/jpem-2017-0539.
14. Nordstrom, M.; Hansen, B.H.; Paus, B.; Kolset, S.O. Accelerometer-Determined Physical Activity and Walking Capacity in Persons with Down Syndrome, Williams Syndrome and Prader-Willi Syndrome. *Res Dev Disabil* **2013**, *34*, 4395–403, doi:10.1016/j.ridd.2013.09.021.
15. Rubin, D.A.; Duran, A.T.; Haqq, A.M.; Gertz, E.R.; Dumont-Driscoll, M. Changes in Cardiometabolic Markers in Children with Prader-Willi Syndrome and Nonsyndromic Obesity Following Participation in a Home-Based Physical Activity Intervention. *Pediatr Obes* **2018**, *13*, 734–743, doi:10.1111/ijpo.12462.
16. Sellinger, M.H.; Hodapp, R.M.; Dykens, E.M. Leisure Activities of Individuals with Prader-Willi, Williams, and Down Syndromes. *J. Dev. Phys. Disabil.* **2006**, *18*, 59–71, doi:10.1007/s10882-006-9006-8.
17. van den Berg-Emons, R.; Festen, D.; Hokken-Koelega, A.; Bussmann, J.; Stam, H. Everyday Physical Activity and Adiposity in Prader-Willi Syndrome. *J Pediatr Endocrinol Metab* **2008**, *21*, 1041–8.
18. van Mil, E.; Westerterp, K.R.; Kester, A.D.M.; Curfs, L.M.G.; Gerver, W.J.M.; Schrandt-Stumpel, C.; Saris, W.H.M. Activity Related Energy Expenditure in Children and Adolescents with Prader-Willi Syndrome. *Int. J. Obes.* **2000**, *24*, 429–434, doi:10.1038/sj.ijo.0801175.

19. Woods, S.G.; Knehans, A.; Arnold, S.; Dionne, C.; Hoffman, L.; Turner, P.; Baldwin, J. The Associations between Diet and Physical Activity with Body Composition and Walking a Timed Distance in Adults with Prader-Willi Syndrome. *Food Nutr Res* **2018**, *62*, 1343–1354, doi:10.29219/fnr.v62.1343.
